# Supplementary material for: Structural and Functional Insights into the Roles of Potential Metal-Binding Sites in Apostichopus japonicus Ferritin
Source: MDPI journal article supplement (doi:10.3390/polym14245378), 2022-12-08
Supplement: s1 [file s1]

# Structural and Functional Insights into the Roles of Potential Metal-Binding Sites in *Apostichopus japonicus* Ferritin

Yan Wu <sup>1,2,3,†</sup>, Chunheng Huo <sup>1,3,4,†</sup>, Tinghong Ming <sup>1,3,4,\*</sup>, Yan Liu <sup>5</sup>, Chang Su <sup>5</sup>, Xiaoting Qiu <sup>2</sup>, Chenyang Lu <sup>1,3,4</sup>, Jun Zhou <sup>1,3,4</sup>, Ye Li <sup>1,3,4</sup>, Zhen Zhang <sup>1,3,4</sup>, Jiaojiao Han <sup>1,3,4</sup>, Ying Feng <sup>1,3,4,6</sup> and Xiurong Su <sup>1,3,4,\*</sup>

<sup>1</sup> State Key Laboratory for Managing Biotic and Chemical Threats to the Quality and Safety of Agro-Products, Ningbo University, Ningbo 315211, China

<sup>2</sup> College of Food and Pharmaceutical Sciences, Ningbo University, Ningbo 315832, China

<sup>3</sup> Key Laboratory of Aquacultural Biotechnology Ministry of Education, Ningbo University, Ningbo 315832, China

<sup>4</sup> School of Marine Science, Ningbo University, Ningbo 315832, China

<sup>5</sup> Zhejiang Collaborative Innovation Center for High Value Utilization of Byproducts from Ethylene Project, Ningbo Polytechnic, Ningbo 315800, China

<sup>6</sup> College of Life Sciences, Tonghua Normal University, Tonghua 134000, China

\* Correspondence: mingtinghong@nbu.edu.cn (T.M.); suxiurong\_public@163.com (X.S.); Tel./Fax: +86-574-87608368 (X.S.)

† These authors contributed equally to this work.

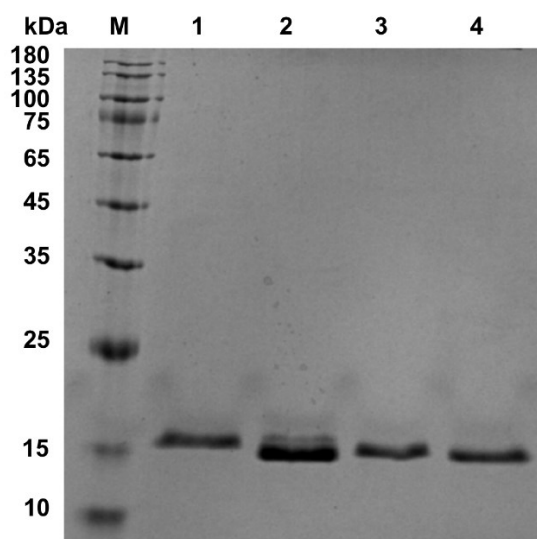

**Figure S1.** SDS-PAGE analyses of the AjFER and its variants. Lane 1: AjFER, Lane 2: AjFER-E25A/E60A/E105A mutant (MF), Lane 3: AjFER-D129A/E132A mutant (M3), Lane 4: AjFER-E168A mutant (M4).

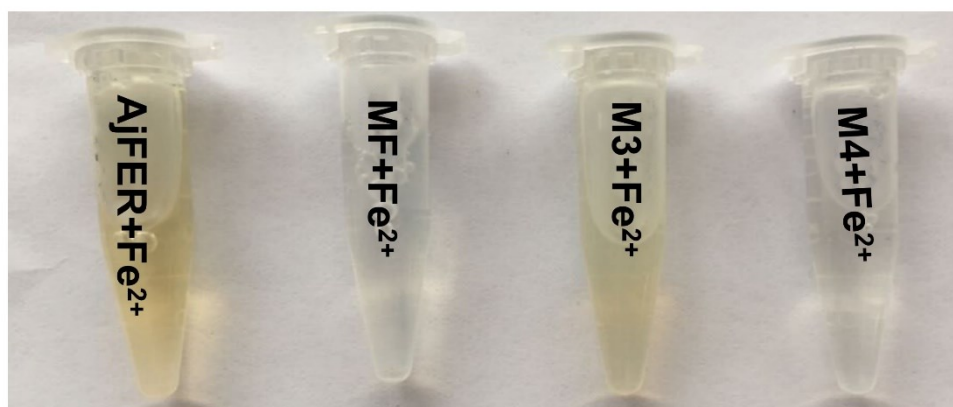

**Figure S2.** Solutions of AjFER and its variants after  $\text{Fe}^{2+}$  uptake. AjFER+ $\text{Fe}^{2+}$ :  $\text{Fe}^{2+}$ -loaded AjFER, MF+ $\text{Fe}^{2+}$ :  $\text{Fe}^{2+}$ -loaded AjFER-E25A/E60A/E105A, M3+ $\text{Fe}^{2+}$ :  $\text{Fe}^{2+}$ -loaded AjFER-D129A/E132A, M4+ $\text{Fe}^{2+}$ :  $\text{Fe}^{2+}$ -loaded AjFER-E168A.

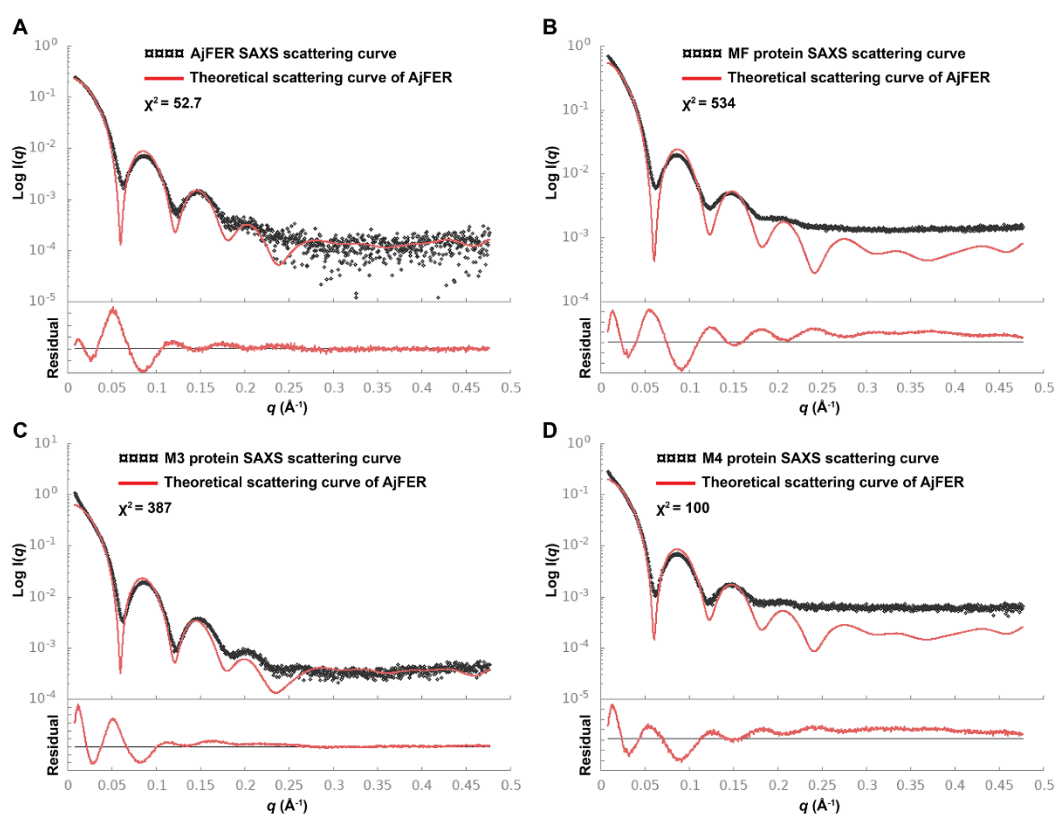

**Figure S3.** The theoretical scattering curve from the crystal structure of AjFER (PDB code: 7VHR) was fitted into the experimental SAXS data of the (A) AjFER; (B) the AjFER-E25A/E60A/E105A mutant (MF); (C) the AjFER-D129A/E132A mutant (M3); (D) the AjFER-E168A mutant (M4).

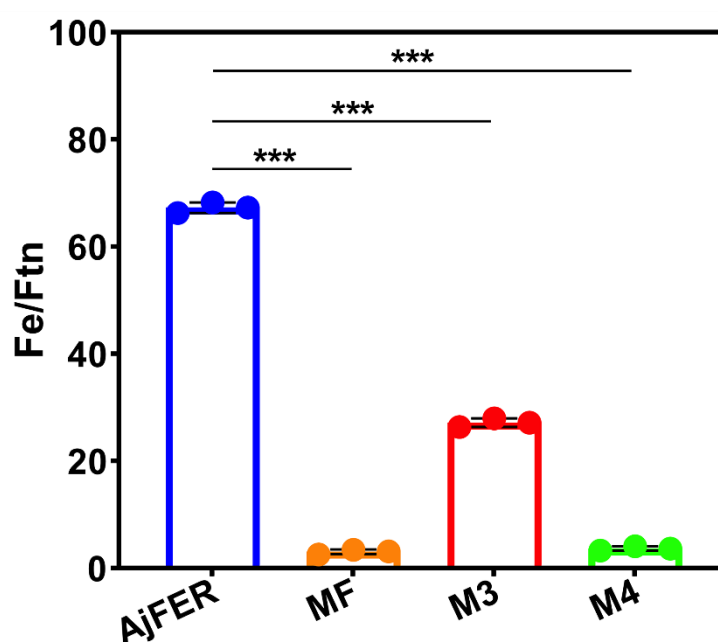

**Figure S4.** The determination of the iron contents in the protein samples by ICP-MS. MF: AjFER-E25A/E60A/E105A mutant, M3: AjFER-D129A/E132A mutant, M4: AjFER-E168A mutant. \*\*\* $p$ -value <0.001; Control group: AjFER.

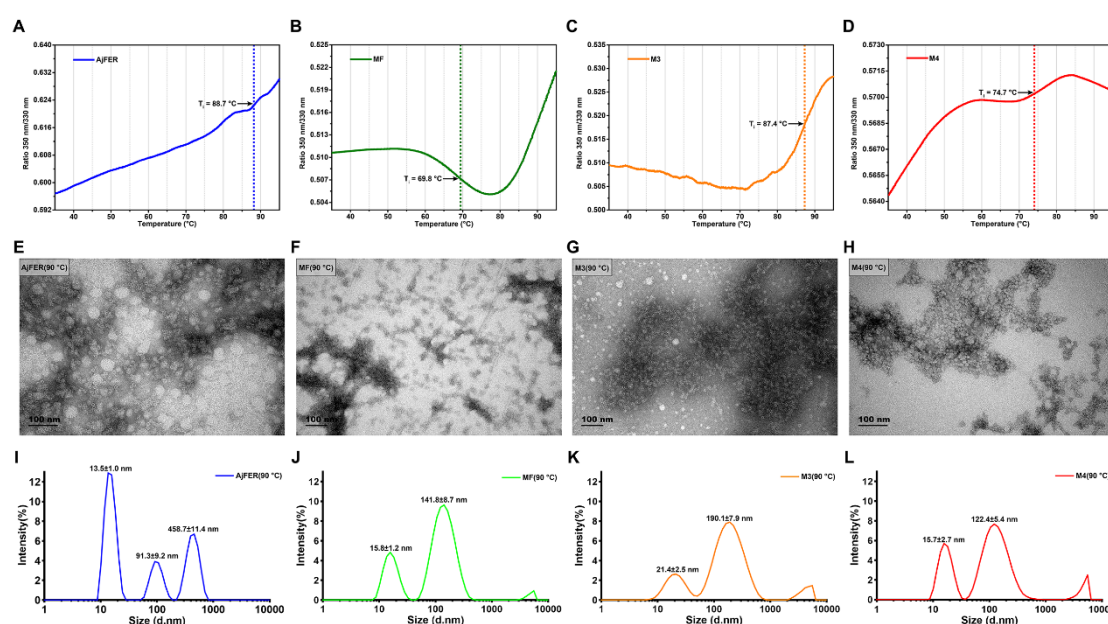

**Figure S5.** Unfolding profiles of the (A) AjFER, (B) AjFER-E25A/E60A/E105A mutant (MF), (C) AjFER-D129A/E132A mutant (M3) and (D) AjFER-E168A mutant (M4) proteins were measured with Tycho NT.6, yielding inflection temperatures of protein unfolding ( $T_i$ ). Transmission electron microscopy (TEM) images of the (E) AjFER, (F) MF, (G) M3 and (H) M4 proteins at 90 °C for 10 min. Scale bars represent 100 nm. (I–L) Dynamic light scattering (DLS) intensity of the AjFER and its variants upon thermal treatment at 90 °C for 10 min. Values are represented as the mean  $\pm$  SD of three replicates.

**Table S1.** The percentage content of secondary structure elements of AjFER and its variants.

|       | $\alpha$ -Helix | $\beta$ -sheet | $\beta$ -turn | random coil |
|-------|-----------------|----------------|---------------|-------------|
| AjFER | 84.7±1.0        | 0              | 15.3±0.6      | 0           |
| MF    | 84.9±1.1        | 3.1±0.6***     | 9.2±0.6***    | 2.8±0.5***  |
| M3    | 82.4±2.4        | 0              | 15.7±0.7      | 1.9±0.4***  |
| M4    | 86.1±1.0        | 0              | 13.9±1.0      | 0           |

\*\*\**p*-value <0.001; Control group: AjFER.**Table S2.** The distances of metal ion coordination in the M3 protein.

| Bond distances (Å) |           |           |           |           |           |           |
|--------------------|-----------|-----------|-----------|-----------|-----------|-----------|
| Fe1                | 2.17±0.15 | 2.23±0.06 | 2.30±0.10 | 2.60±0.10 | -         | -         |
|                    | (Glu25)   | (Glu60)   | (His63)   | (Wat1)    | -         | -         |
| Fe2                | 2.30±0.10 | 2.37±0.06 | 2.37±0.06 | 3.57±0.15 | -         | -         |
|                    | (Glu60)   | (Glu105)  | (Wat1)    | (Wat2)    | -         | -         |
| Cd                 | 2.47±0.21 | 2.33±0.06 | 2.37±0.06 | 3.70±0.10 | 3.53±0.15 | 3.50±0.10 |
|                    | (Asp120)  | (His116)  | (Cys128)  | (Wat1)    | (Wat2)    | (Wat3)    |

**Table S3.** Small-angle X-ray scattering data collection and statistics.

|                                                         | AjFER  | MF             | M3     | M4     |
|---------------------------------------------------------|--------|----------------|--------|--------|
| <b>Data collection parameters</b>                       |        |                |        |        |
| Beamline                                                |        | SSRF-BL19U2    |        |        |
| Wavelength (Å)                                          |        | 1.24           |        |        |
| <i>q</i> range (Å <sup>-1</sup> )                       |        | 0.0084-0.4764  |        |        |
| Exposure time (s)                                       |        | 1.0            |        |        |
| Protein concentration (mg/mL)                           |        | 1~4            |        |        |
| Temperature (K)                                         |        | 293            |        |        |
| <b>Structural parameters</b>                            |        |                |        |        |
| <i>I</i> (0) arbitrary units from Guinier               | 0.24   | 0.59           | 0.66   | 0.22   |
| <i>I</i> (0) arbitrary units from <i>p</i> ( <i>r</i> ) | 0.24   | 0.59           | 0.66   | 0.22   |
| <i>R<sub>g</sub></i> from Guinier (Å)                   | 52.87  | 53.18          | 53.58  | 53.81  |
| <i>R<sub>g</sub></i> from <i>p</i> ( <i>r</i> ) (Å)     | 52.61  | 52.94          | 53.31  | 53.54  |
| <i>D<sub>max</sub></i> (Å)                              | 120    | 121            | 125    | 126    |
| Porod volume estimate (Å <sup>3</sup> )                 | 606063 | 731868         | 674254 | 712333 |
| MWs from <i>I</i> (0) (kDa)                             | 481.3  | 510.2          | 882.2  | 602.8  |
| MWs from sequence (kDa)                                 | 480.96 | 476.88         | 478.56 | 479.52 |
| <b>Software employed</b>                                |        |                |        |        |
| Data processing                                         |        | PRIMUS         |        |        |
| <i>p</i> ( <i>r</i> ) function calculation              |        | GNOM           |        |        |
| Ab initio modeling                                      |        | DAMMIF         |        |        |
| Validation and averaging                                |        | DAMMIN, DAMMIX |        |        |
| 3-D graphical representation                            |        | PyMOL          |        |        |
| <b>Modeling parameters</b>                              |        |                |        |        |
| Discrepancy value (χ <sup>2</sup> )                     | 52.7   | 534            | 387    | 100    |

**Table S4.** The percentage content of secondary structure elements of AjFER and its variants after Fe<sup>2+</sup> uptake.

|                        | $\alpha$ -Helix | $\beta$ -sheet | $\beta$ -turn | random coil |
|------------------------|-----------------|----------------|---------------|-------------|
| AjFER+Fe <sup>2+</sup> | 82.7±0.6        | 0              | 13.1±0.3      | 4.2±0.2     |
| MF+Fe <sup>2+</sup>    | 86.2±0.5***     | 1.2±0.1***     | 12.0±0.3**    | 0.6±0.1***  |
| M3+Fe <sup>2+</sup>    | 81.9±0.4        | 0              | 15.4±0.4***   | 2.7±0.1***  |
| M4+Fe <sup>2+</sup>    | 82.6±0.5        | 4.3±0.1***     | 13.0±0.2      | 0           |

\*\**p*-value <0.01, \*\*\**p*-value <0.001; Control group: AjFER+Fe<sup>2+</sup>.
